# Supplementary material
Source: PubMed Central journal article supplement (PMC6300058)

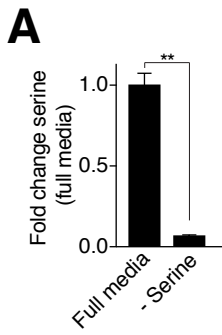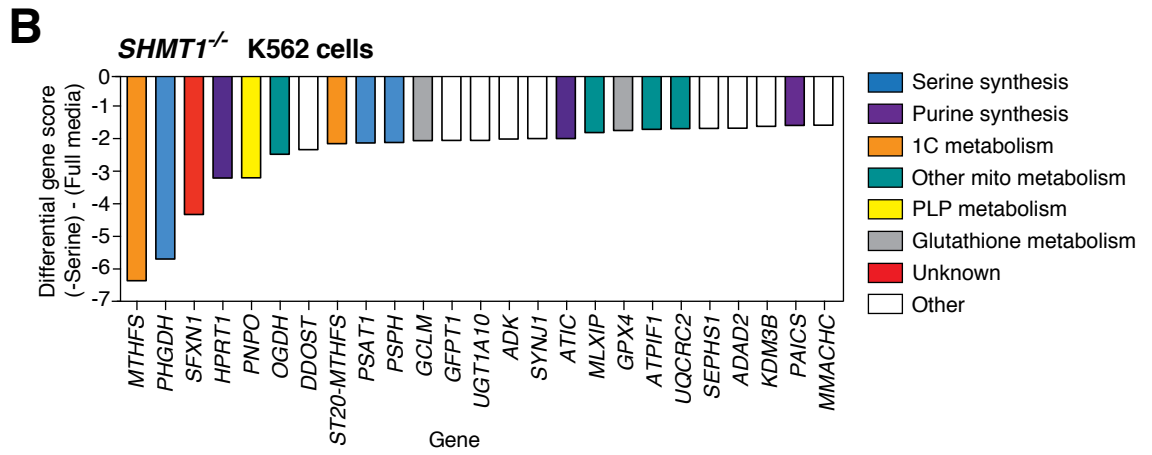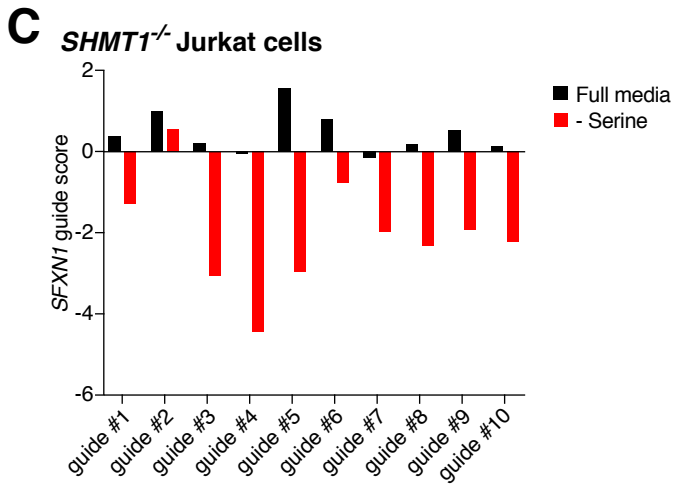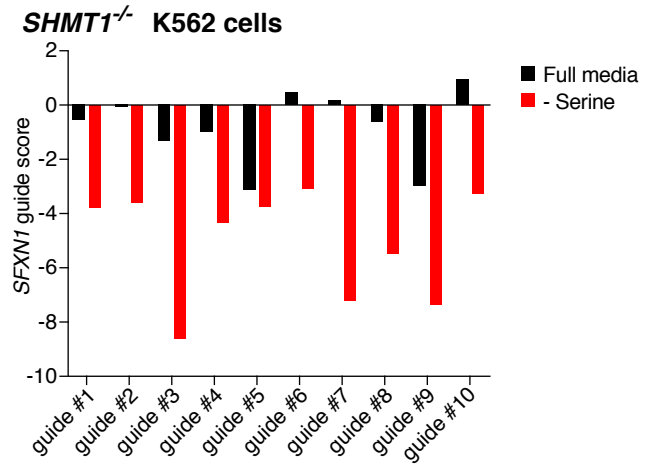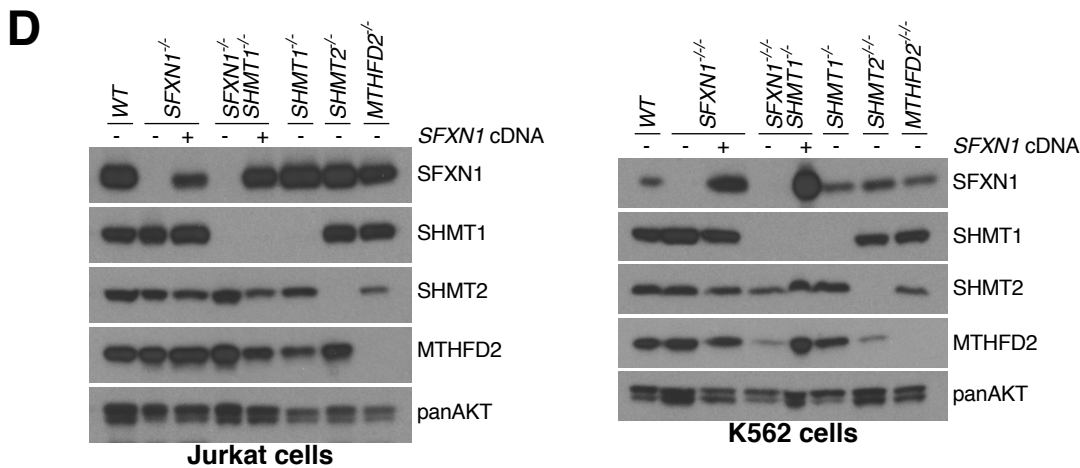

Supplement: NIHMS999380-supplement-Supp_Figure.pdf [file NIHMS999380-supplement-Supp_Figure.pdf]

**A**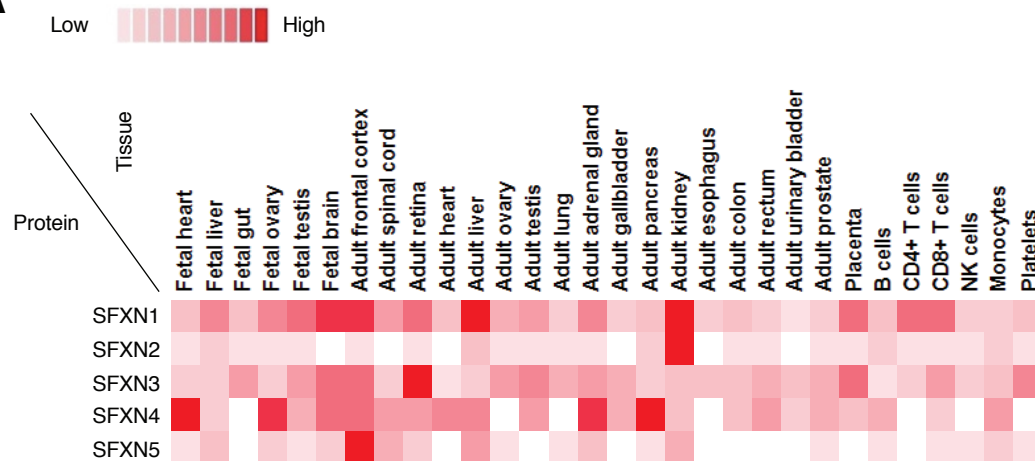**B**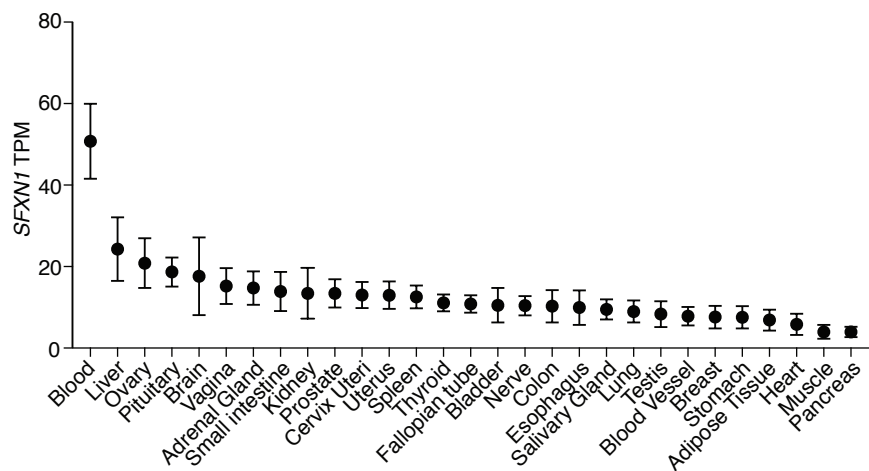**C**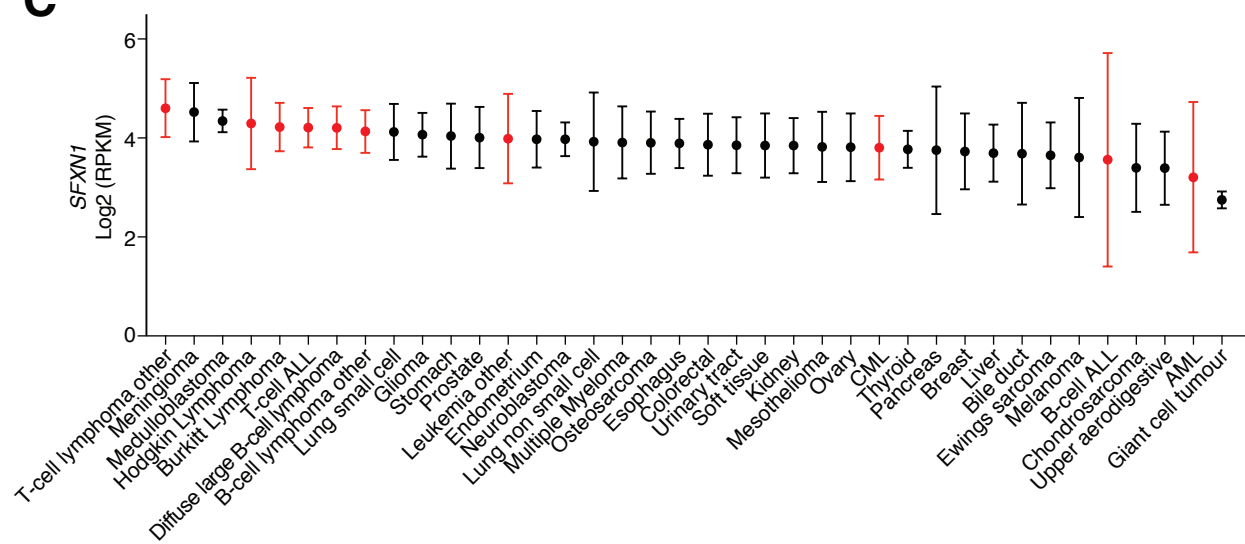

Supplement: NIHMS999380-supplement-Supp_Figure_2.pdf [file NIHMS999380-supplement-Supp_Figure_2.pdf]

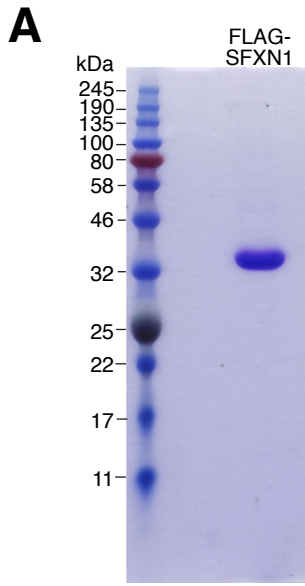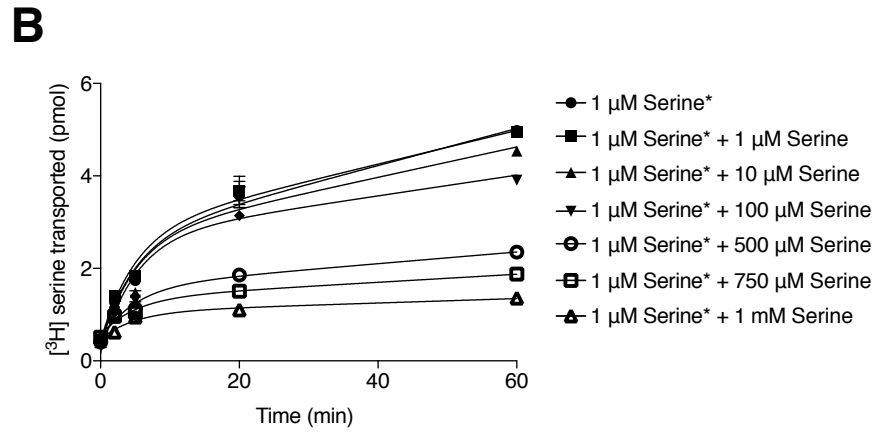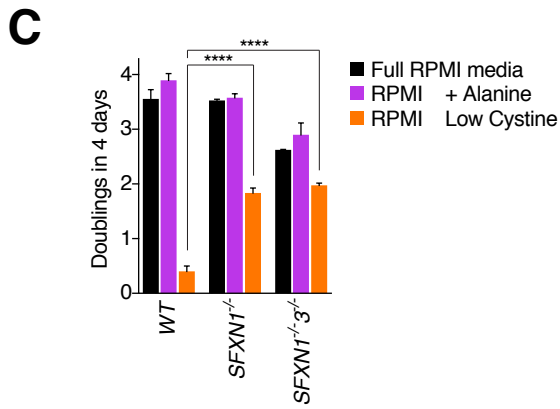

Supplement: NIHMS999380-supplement-Supp_Figure_4.pdf [file NIHMS999380-supplement-Supp_Figure_4.pdf]

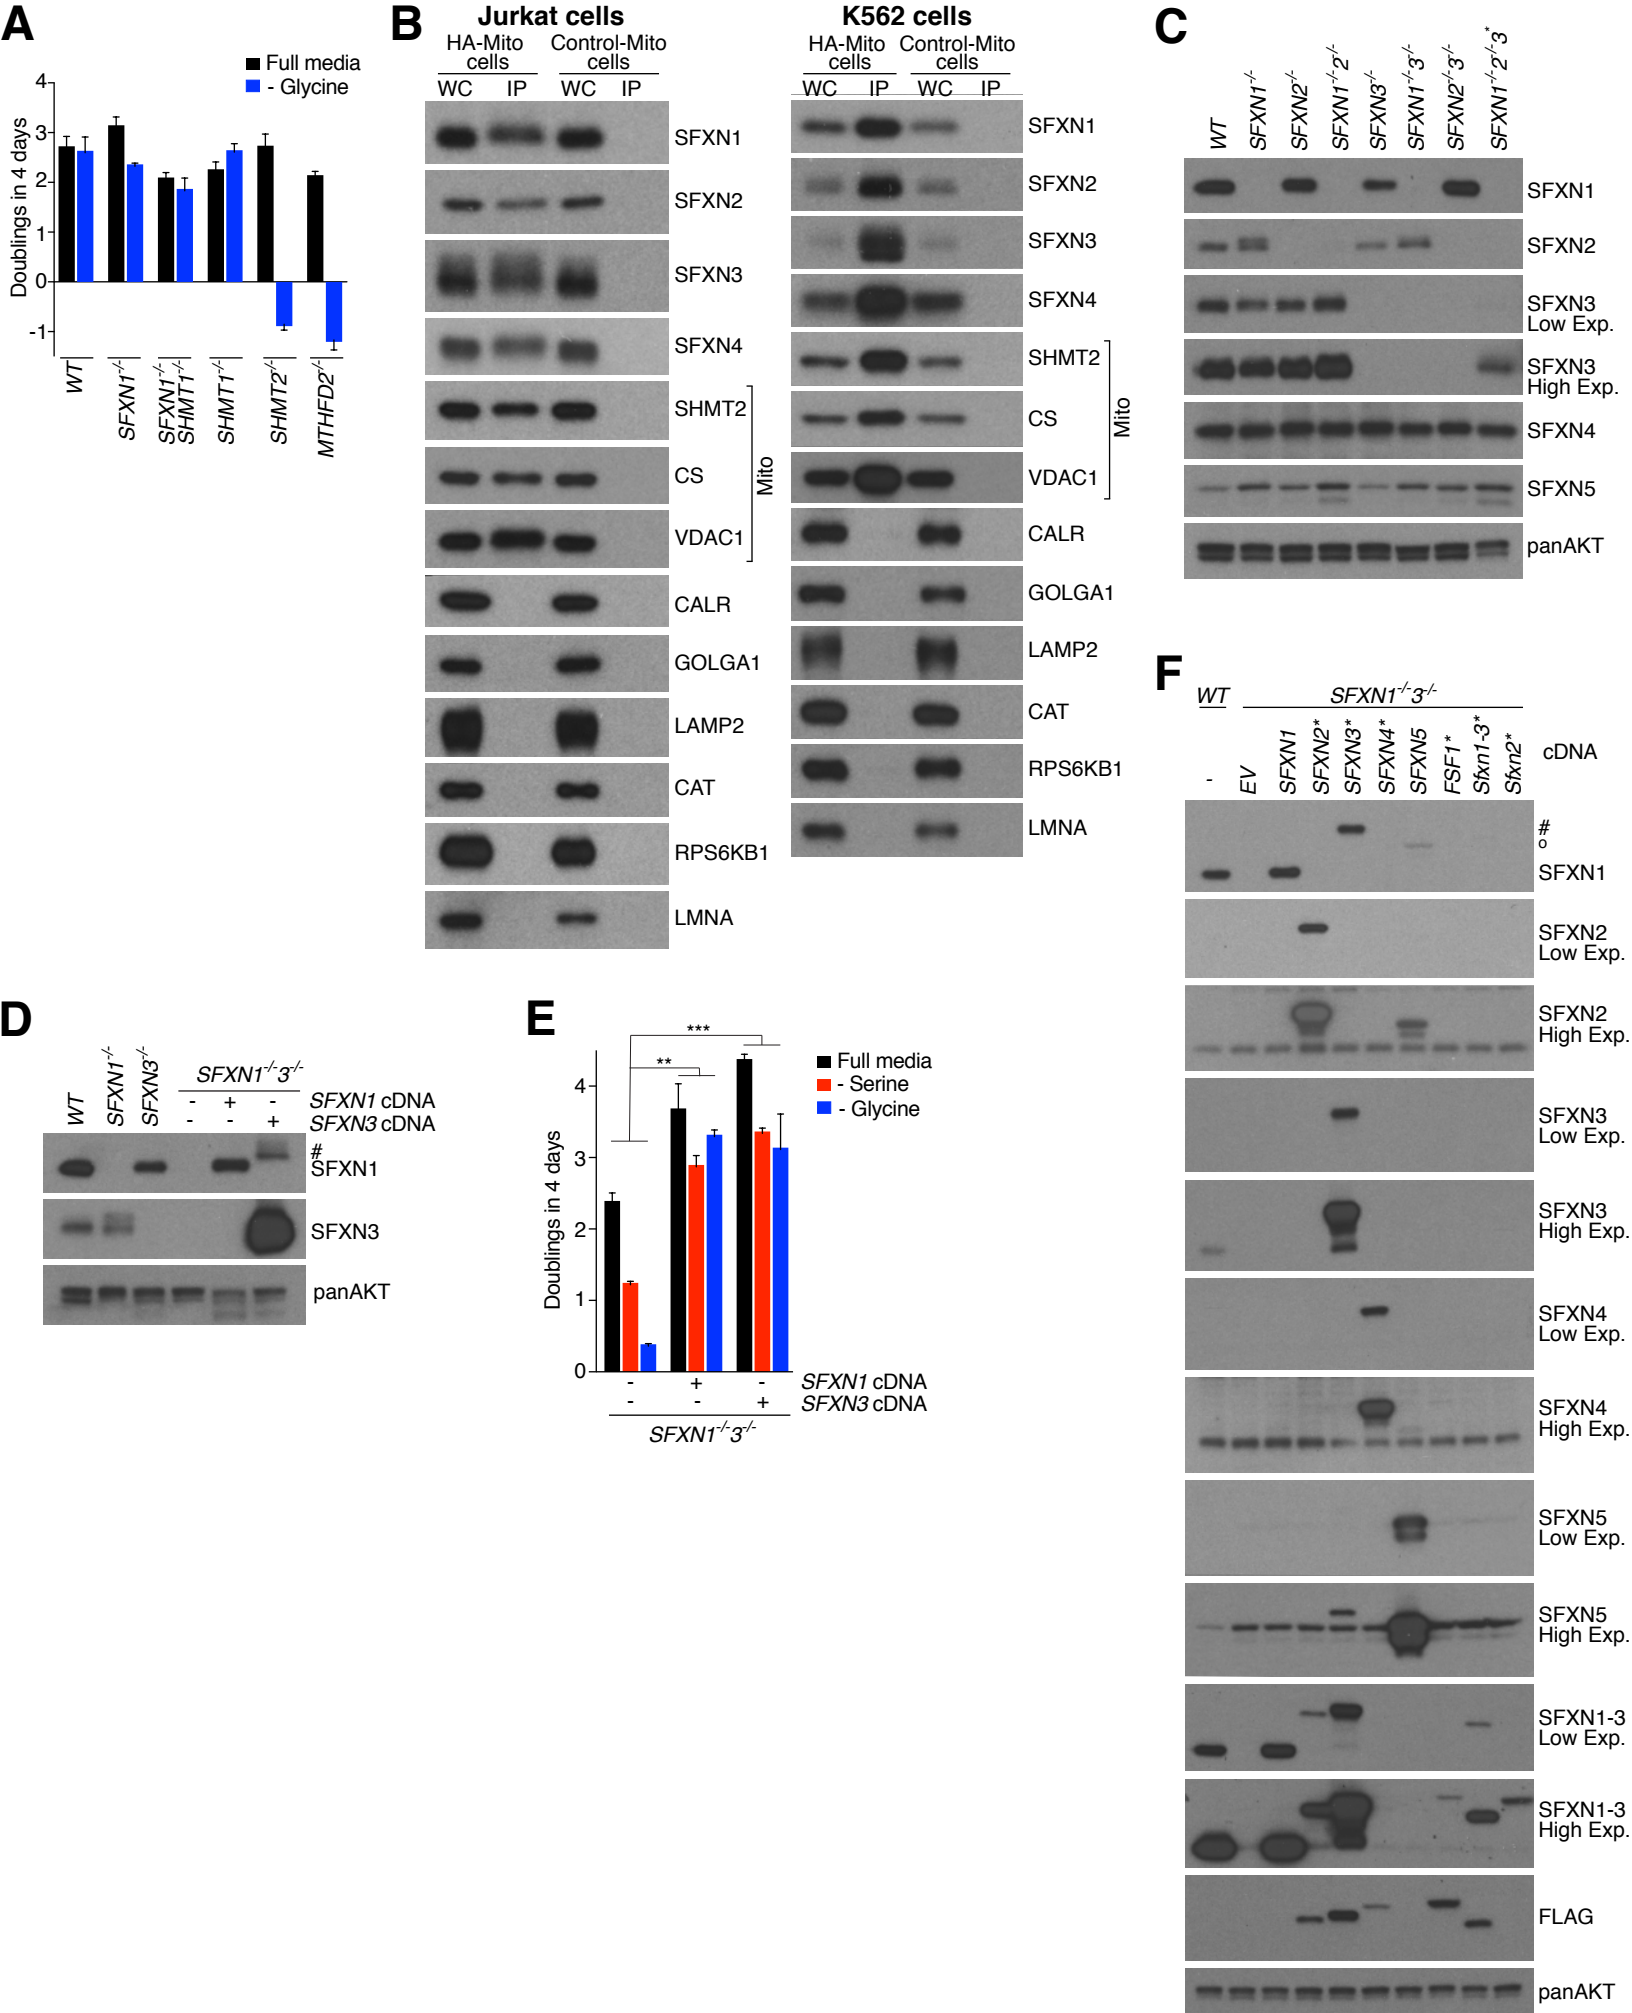

Supplement: NIHMS999380-supplement-Supp_Figure_5.pdf [file NIHMS999380-supplement-Supp_Figure_5.pdf]

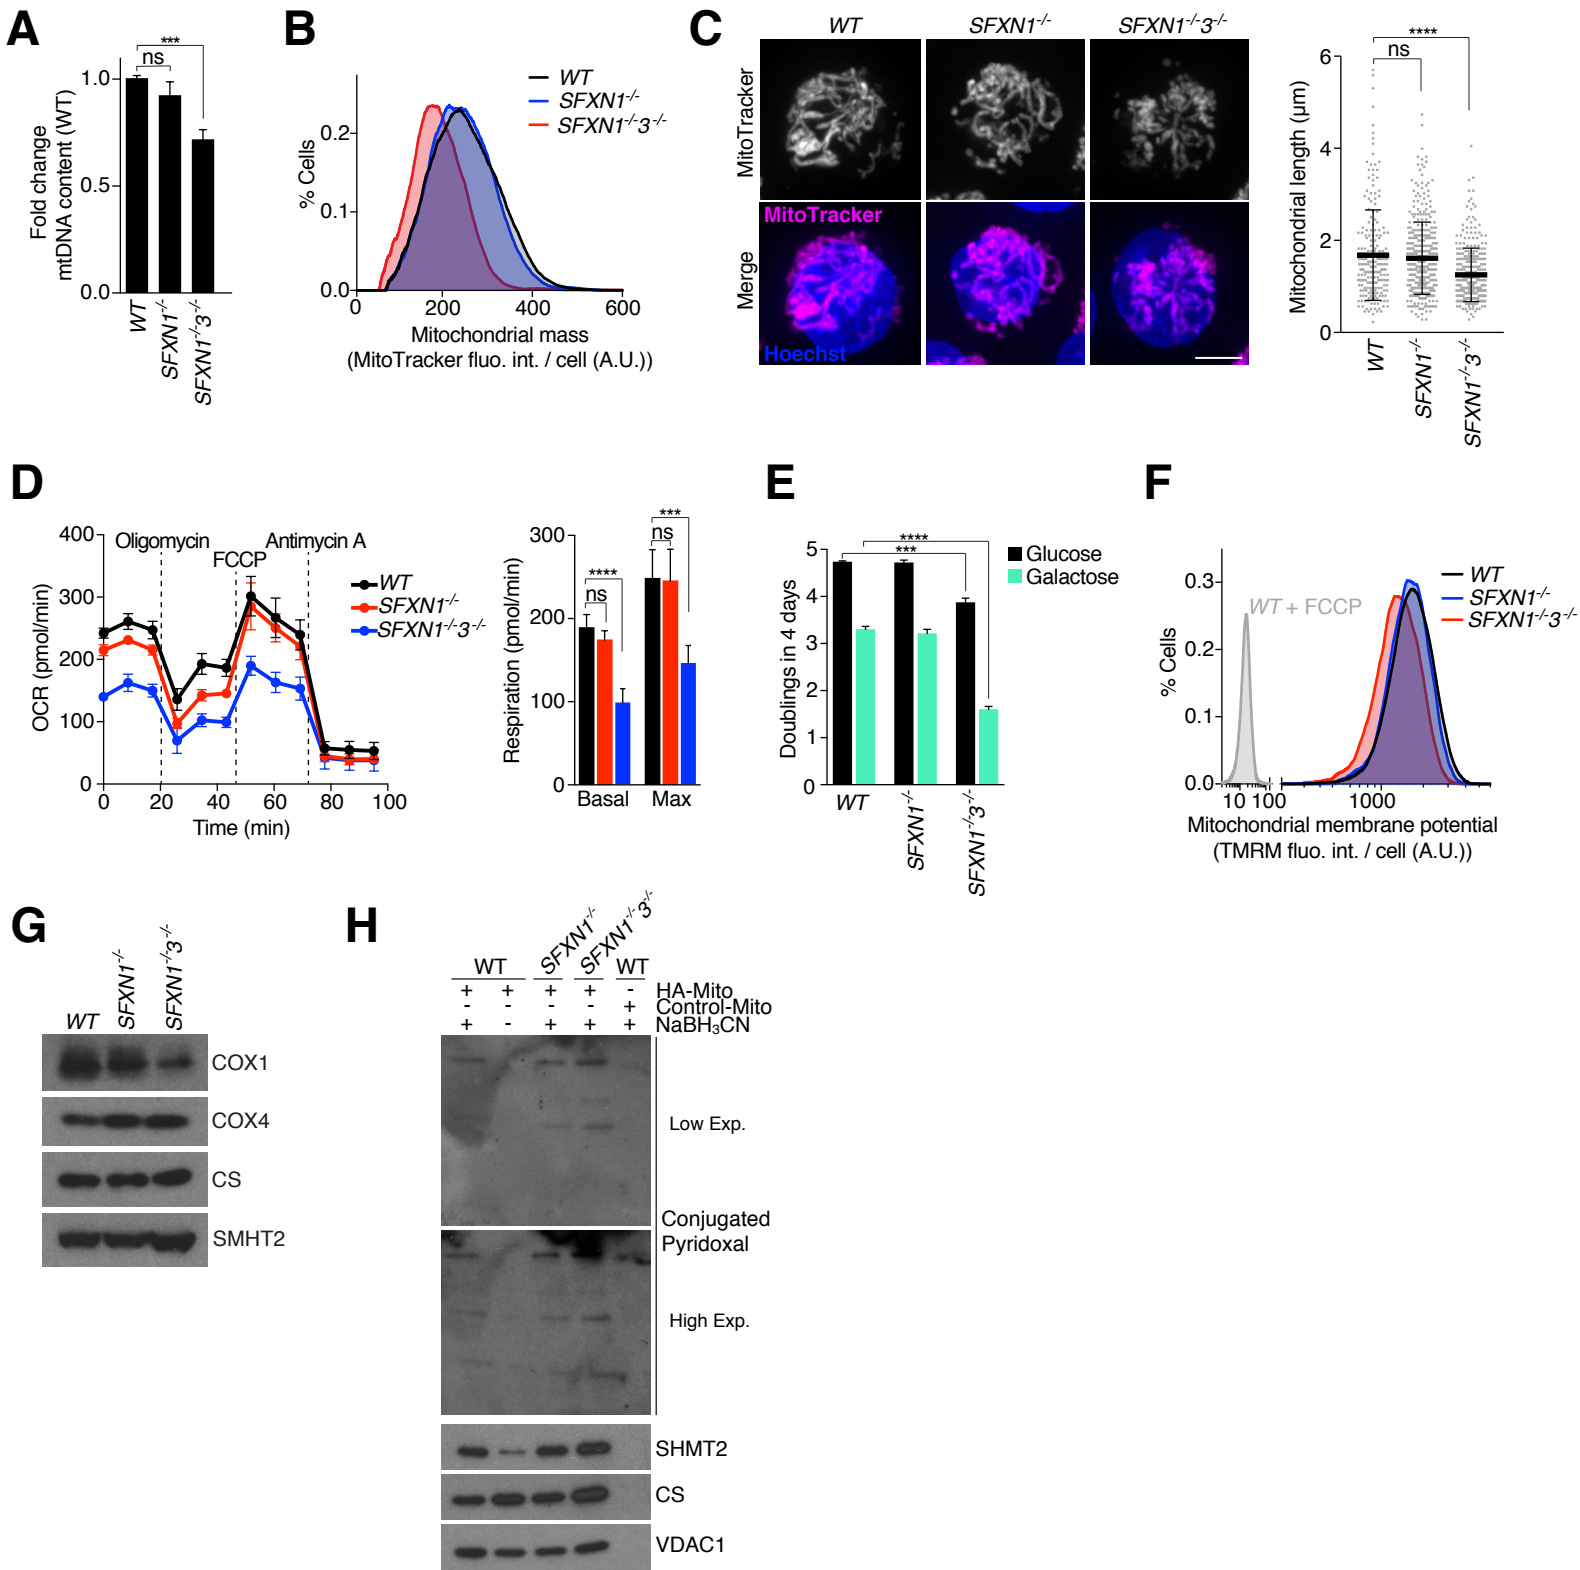

Supplement: NIHMS999380-supplement-Supp_Figure_6.pdf [file NIHMS999380-supplement-Supp_Figure_6.pdf]
